# Supplementary material for: Bathochromic Shift of Fluorescence Peak in Dipyrrolo[1,2-a:2′,1′-c]quinoxaline by Introducing Each of Electron-Donating and Electron-Withdrawing Substituent
Source: MDPI journal article supplement (doi:10.3390/molecules28072896), 2023-03-23

# Electronic Supporting Information for the article entitled

## Bathochromic Shift of Fluorescence Peak in Dipyrrolo[1,2-*a*:2',1'-*c*]quinoxaline by Introducing Each of Electron-Donating and Electron-Withdrawing Substituent

Shoji Matsumoto,\* Makoto Takamori, and Motohiro Akazome

Department of Applied Chemistry and Biotechnology, Graduate School of Engineering, Chiba University, 1-33 Yayoi-cho, Inage-ku, Chiba 263-8522, Japan

E-mail address: smatsumo@faculty.chiba-u.jp

### Table of Contents

|                                                                                                                    |         |
|--------------------------------------------------------------------------------------------------------------------|---------|
| 1. Computed transition peaks of <b>1a-d</b> in the excited state (TDDFT calculation)                               | .....S2 |
| 2. HOMO and LUMO energies of <b>1a-d</b> (DFT calculation)                                                         | .....S3 |
| 3. Energies, and Cartesian coordinates of <b>1a-d</b> optimized by DFT and TDDFT calculation                       | .....S4 |
| 4. <sup>1</sup> H and <sup>13</sup> C NMR spectra, and HRMS charts for new compounds ( <b>1b-d</b> and <b>3d</b> ) | .....S8 |

**Table S1.** Computed three longest transition peaks of **1a-d** in the excited singlet state calculated by TDDFT (nstate = 10) using optimized structure (TDDFT (nstate = 1) for the excited state) at TDDFT/ $\omega$ B97XD/6-31+G(d,p) level

| Compound  | Transition                              | Band gap (eV) | Wavelength (nm) | Oscillator strength |
|-----------|-----------------------------------------|---------------|-----------------|---------------------|
| <b>1a</b> | HOMO $\rightarrow$ LUMO (0.69563)       | 3.4559        | 358.76          | 0.1507              |
|           | HOMO-1 $\rightarrow$ LUMO (0.20414)     | 4.1183        | 301.06          | 0.0015              |
|           | HOMO $\rightarrow$ LUMO+1 (0.66320)     |               |                 |                     |
|           | HOMO-2 $\rightarrow$ LUMO+1 (-0.15826)  | 4.5444        | 272.83          | 0.2249              |
|           | HOMO-1 $\rightarrow$ LUMO (0.62692)     |               |                 |                     |
|           | HOMO $\rightarrow$ LUMO+1 (-0.21684)    |               |                 |                     |
| <b>1b</b> | HOMO $\rightarrow$ LUMO (0.69702)       | 3.4219        | 362.32          | 0.1426              |
|           | HOMO-1 $\rightarrow$ LUMO (0.50409)     | 4.2142        | 294.21          | 0.0478              |
|           | HOMO $\rightarrow$ LUMO+1 (-0.45588)    |               |                 |                     |
|           | HOMO-2 $\rightarrow$ LUMO+1 (-0.11140)  | 4.4677        | 277.51          | 0.2229              |
|           | HOMO-1 $\rightarrow$ LUMO (0.43801)     |               |                 |                     |
|           | HOMO $\rightarrow$ LUMO+1 (0.51652)     |               |                 |                     |
| <b>1c</b> | HOMO $\rightarrow$ LUMO (0.69829)       | 3.3497        | 370.13          | 0.1234              |
|           | HOMO-1 $\rightarrow$ LUMO (0.27068)     | 4.1404        | 299.45          | 0.0089              |
|           | HOMO $\rightarrow$ LUMO+1 (0.63558)     |               |                 |                     |
|           | HOMO-2 $\rightarrow$ LUMO+1 (0.13571)   | 4.4839        | 276.51          | 0.2385              |
|           | HOMO-1 $\rightarrow$ LUMO (0.60629)     |               |                 |                     |
|           | HOMO $\rightarrow$ LUMO+1 (-0.28423)    |               |                 |                     |
| <b>1d</b> | HOMO 62 $\rightarrow$ LUMO 63 (0.69979) | 3.2895        | 376.91          | 0.1122              |
|           | HOMO-1 $\rightarrow$ LUMO (-0.30893)    | 4.1387        | 299.57          | 0.0029              |
|           | HOMO $\rightarrow$ LUMO+1 (0.62104)     |               |                 |                     |
|           | HOMO-2 $\rightarrow$ LUMO+1 (-0.12028)  | 4.4321        | 279.74          | 0.2516              |
|           | HOMO-1 $\rightarrow$ LUMO (0.59214)     |               |                 |                     |
|           | HOMO $\rightarrow$ LUMO+1 (0.32296)     |               |                 |                     |

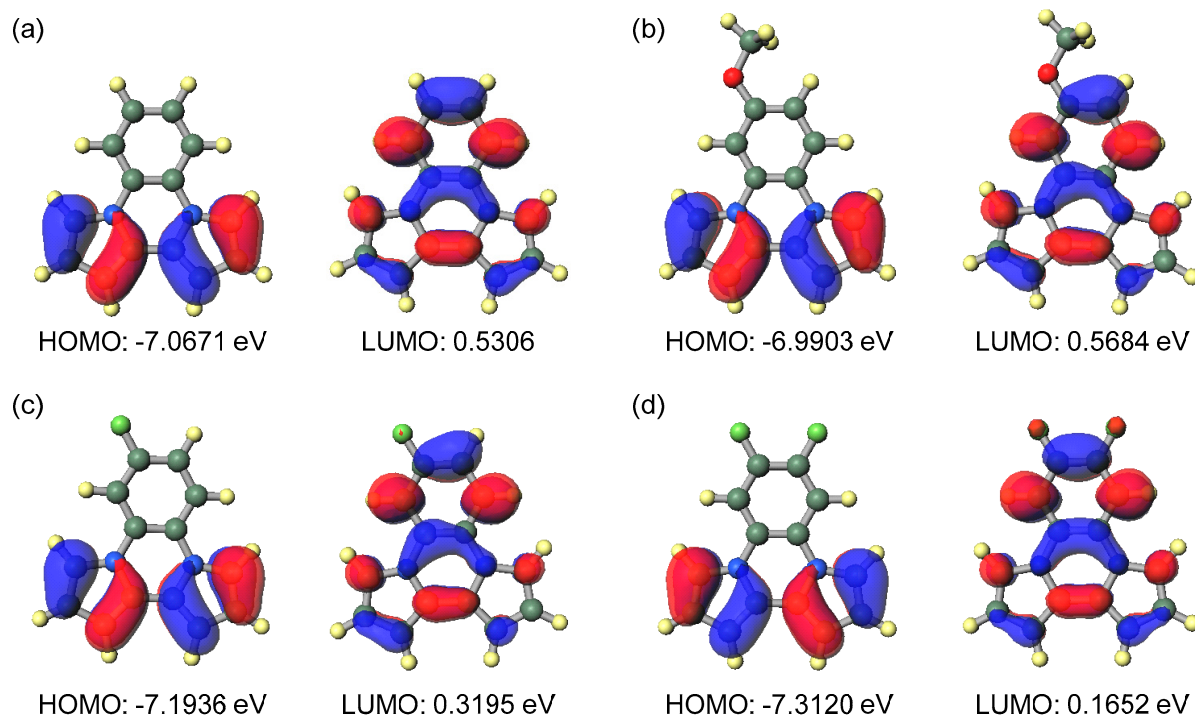

**Figure S1.** Shape and energies of HOMO and LUMO of (a) **1a**, (b) **1b**, (c) **1c**, and (d) **1d** calculated by DFT/ $\omega$ B97XD/6-31+G(d,p) level of theory. Optimized structure was estimated by DFT/ $\omega$ B97XD/6-31+G(d,p) level of theory.

### Dipyrrolo[1,2-*a*:2',1'-*c*]quinoxaline (1a) optimized by TDDFT calculation

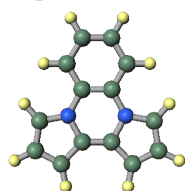

Total energy: -648.812490362 A.U.

Cartesian coordinates:

|     |           |           |           |     |           |           |           |
|-----|-----------|-----------|-----------|-----|-----------|-----------|-----------|
| C1  | 1.490552  | -0.689215 | -0.000005 | C12 | -2.185345 | -1.415488 | 0.000027  |
| N1  | 0.261564  | -1.356826 | 0.000008  | H1  | -0.299057 | 3.416155  | -0.000018 |
| C2  | -0.978993 | -0.700576 | 0.000011  | H2  | 2.368202  | 3.876852  | -0.000034 |
| C3  | -0.978975 | 0.700582  | 0.000001  | H3  | 2.368183  | -3.876862 | 0.000005  |
| N2  | 0.261564  | 1.356824  | -0.000010 | H4  | -0.299073 | -3.416151 | 0.000024  |
| C4  | 1.490561  | 0.689208  | -0.000013 | C13 | -3.401351 | -0.687831 | 0.000028  |
| C5  | 0.500779  | 2.694910  | -0.000019 | H5  | -2.197506 | -2.496838 | 0.000036  |
| C6  | 1.894973  | 2.905813  | -0.000027 | H6  | -2.197507 | 2.496849  | -0.000010 |
| C7  | 2.522044  | 1.675816  | -0.000025 | C14 | -3.401338 | 0.687843  | 0.000014  |
| C8  | 2.522031  | -1.675824 | -0.000008 | H7  | -4.339899 | -1.232372 | 0.000040  |
| C9  | 1.894957  | -2.905822 | 0.000004  | H8  | -4.339885 | 1.232389  | 0.000015  |
| C10 | 0.500770  | -2.694914 | 0.000014  | H9  | 3.581376  | 1.467424  | -0.000030 |
| C11 | -2.185348 | 1.415499  | 0.000000  | H10 | 3.581363  | -1.467432 | -0.000017 |

### 6-Methoxydipyrrolo[1,2-*a*:2',1'-*c*]quinoxaline (1b) optimized by TDDFT calculation

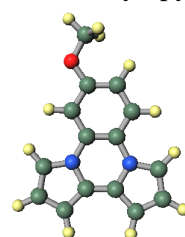

Total energy: -763.305540663 A.U.

Cartesian coordinates:

|     |           |           |           |     |           |           |           |
|-----|-----------|-----------|-----------|-----|-----------|-----------|-----------|
| C1  | 2.278960  | -0.462446 | -0.000026 | H2  | 2.388823  | 4.186398  | -0.000117 |
| N1  | 1.186228  | -1.327532 | 0.000006  | H3  | 3.684304  | -3.455790 | 0.000009  |
| C2  | -0.155160 | -0.886655 | 0.000020  | H4  | 0.975929  | -3.448476 | 0.000044  |
| C3  | -0.380577 | 0.498634  | -0.000008 | C13 | -2.556442 | -1.271114 | 0.000068  |
| N2  | 0.726140  | 1.351185  | -0.000041 | H5  | -1.062580 | -2.845918 | 0.000079  |
| C4  | 2.050825  | 0.898606  | -0.000054 | H6  | -1.907532 | 2.066089  | -0.000037 |
| C5  | 0.741489  | 2.709818  | -0.000063 | C14 | -2.768141 | 0.092819  | 0.000037  |
| C6  | 2.084111  | 3.150071  | -0.000093 | H7  | -3.377866 | -1.975212 | 0.000093  |
| C7  | 2.905581  | 2.042335  | -0.000088 | O1  | -3.995820 | 0.684091  | 0.000039  |
| C8  | 3.461828  | -1.259084 | -0.000034 | H8  | 3.984782  | 2.011777  | -0.000108 |
| C9  | 3.053677  | -2.578920 | 0.000001  | H9  | 4.470136  | -0.873185 | -0.000057 |
| C10 | 1.644639  | -2.603908 | 0.000021  | C15 | -5.130924 | -0.150827 | 0.000111  |
| C11 | -1.689875 | 1.007740  | -0.000001 | H10 | -5.160205 | -0.785627 | -0.894715 |
| C12 | -1.222063 | -1.776023 | 0.000059  | H11 | -5.160125 | -0.785581 | 0.894970  |
| H1  | -0.168029 | 3.287114  | -0.000053 | H12 | -5.995227 | 0.513815  | 0.000132  |

### 6-Fluorodipyrrolo[1,2-*a*:2',1'-*c*]quinoxaline (1c) optimized by TDDFT calculation

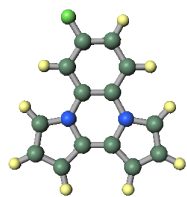

Total energy: -748.024120848 A.U.

Cartesian coordinates:

|     |           |           |           |     |           |           |           |
|-----|-----------|-----------|-----------|-----|-----------|-----------|-----------|
| C1  | 1.920221  | -0.408349 | -0.000001 | C12 | -1.527719 | -1.854140 | 0.000001  |
| N1  | 0.859505  | -1.309649 | 0.000000  | H1  | -0.653885 | 3.252424  | 0.000001  |
| C2  | -0.498585 | -0.916542 | 0.000000  | H2  | 1.869986  | 4.241547  | -0.000002 |
| C3  | -0.766544 | 0.458402  | 0.000001  | H3  | 3.428159  | -3.350688 | 0.000000  |
| N2  | 0.307896  | 1.350248  | 0.000000  | H4  | 0.721286  | -3.436048 | 0.000000  |
| C4  | 1.646351  | 0.944953  | -0.000002 | C13 | -2.878697 | -1.394312 | 0.000001  |
| C5  | 0.275096  | 2.707116  | 0.000000  | H5  | -1.325745 | -2.916020 | 0.000001  |
| C6  | 1.601945  | 3.195235  | -0.000002 | H6  | -2.360323 | 1.976468  | 0.000002  |
| C7  | 2.460727  | 2.117197  | -0.000001 | C14 | -3.109464 | -0.045723 | 0.000001  |
| C8  | 3.129152  | -1.163192 | -0.000001 | H7  | -3.707893 | -2.090044 | 0.000001  |
| C9  | 2.767480  | -2.496349 | 0.000000  | F1  | -4.387810 | 0.403786  | 0.000001  |
| C10 | 1.360635  | -2.569238 | -0.000001 | H8  | 3.540334  | 2.124534  | -0.000002 |
| C11 | -2.100107 | 0.928680  | 0.000002  | H9  | 4.123616  | -0.742860 | -0.000002 |

### 6,7-Difluorodipyrrolo[1,2-*a*:2',1'-*c*]quinoxaline (1d) optimized by TDDFT calculation

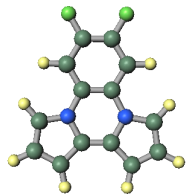

Total energy: -847.228319917 A.U.

Cartesian coordinates:

|     |           |           |           |     |           |           |           |
|-----|-----------|-----------|-----------|-----|-----------|-----------|-----------|
| C1  | 2.076449  | 0.690334  | 0.000000  | C12 | -1.590351 | 1.425033  | 0.000002  |
| N1  | 0.851927  | 1.357547  | 0.000000  | H1  | 0.288498  | -3.412724 | 0.000000  |
| C2  | -0.389307 | 0.698497  | 0.000001  | H2  | 2.957724  | -3.875244 | -0.000002 |
| C3  | -0.389315 | -0.698496 | 0.000001  | H3  | 2.957715  | 3.875248  | 0.000000  |
| N2  | 0.851930  | -1.357549 | 0.000001  | H4  | 0.288489  | 3.412718  | 0.000000  |
| C4  | 2.076447  | -0.690334 | 0.000000  | C13 | -2.795470 | 0.682257  | 0.000000  |
| C5  | 1.088941  | -2.692026 | 0.000000  | H5  | -1.637676 | 2.503218  | 0.000002  |
| C6  | 2.484344  | -2.904520 | -0.000001 | H6  | -1.637671 | -2.503217 | -0.000001 |
| C7  | 3.108333  | -1.674353 | 0.000000  | C14 | -2.795474 | -0.682257 | -0.000001 |
| C8  | 3.108333  | 1.674357  | 0.000000  | F1  | -3.959660 | 1.362413  | 0.000000  |
| C9  | 2.484342  | 2.904520  | 0.000000  | F2  | -3.959663 | -1.362415 | -0.000003 |
| C10 | 1.088937  | 2.692025  | 0.000000  | H7  | 4.167329  | -1.464301 | 0.000000  |
| C11 | -1.590348 | -1.425033 | 0.000000  | H8  | 4.167329  | 1.464302  | 0.000000  |

### Dipyrrolo[1,2-*a*:2',1'-*c*]quinoxaline (1a) optimized by DFT calculation

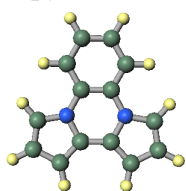

Total energy: -648.825408476 A.U.

Cartesian coordinates:

|     |           |           |           |     |           |           |           |
|-----|-----------|-----------|-----------|-----|-----------|-----------|-----------|
| C1  | 1.487997  | 0.718509  | 0.000006  | C12 | -2.175009 | 1.389537  | -0.000029 |
| N1  | 0.270025  | 1.380690  | -0.000013 | H1  | -0.300890 | -3.457162 | 0.000019  |
| C2  | -0.958883 | 0.703721  | -0.000015 | H2  | 2.354032  | -3.898327 | 0.000028  |
| C3  | -0.959146 | -0.703394 | 0.000000  | H3  | 2.356337  | 3.897185  | -0.000004 |
| N2  | 0.269328  | -1.380678 | 0.000013  | H4  | -0.298503 | 3.457629  | -0.000029 |
| C4  | 1.487760  | -0.719189 | 0.000015  | C13 | -3.377565 | 0.697663  | -0.000028 |
| C5  | 0.503858  | -2.740873 | 0.000020  | H5  | -2.181753 | 2.472721  | -0.000042 |
| C6  | 1.861965  | -2.936509 | 0.000023  | H6  | -2.183789 | -2.471825 | 0.000016  |
| C7  | 2.489923  | -1.662809 | 0.000022  | C14 | -3.377803 | -0.695803 | -0.000012 |
| C8  | 2.490879  | 1.661620  | 0.000014  | H7  | -4.312115 | 1.247826  | -0.000040 |
| C9  | 1.863791  | 2.935587  | -0.000003 | H8  | -4.312839 | -1.245397 | -0.000009 |
| C10 | 0.505423  | 2.740425  | -0.000015 | H9  | 3.549705  | -1.455864 | 0.000026  |
| C11 | -2.175888 | -1.388625 | 0.000002  | H10 | 3.550528  | 1.453959  | 0.000028  |

### 6-Methoxydipyrrolo[1,2-*a*:2',1'-*c*]quinoxaline (1b) optimized by DFT calculation

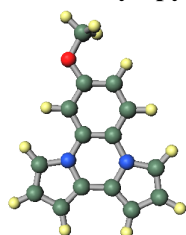

Total energy: -763.318521311 A.U.

Cartesian coordinates:

|     |           |           |           |     |           |           |           |
|-----|-----------|-----------|-----------|-----|-----------|-----------|-----------|
| C1  | -2.285285 | -0.480698 | 0.000079  | H2  | -2.344553 | 4.217374  | -0.000254 |
| N1  | -1.201405 | -1.341853 | 0.000005  | H3  | -3.689099 | -3.461865 | 0.000295  |
| C2  | 0.127669  | -0.884087 | -0.000095 | H4  | -0.996234 | -3.483724 | 0.000163  |
| C3  | 0.371619  | 0.503786  | 0.000024  | C13 | 2.521030  | -1.285708 | -0.000238 |
| N2  | -0.722629 | 1.379824  | -0.000002 | H5  | 1.043358  | -2.824625 | -0.000625 |
| C4  | -2.036908 | 0.935954  | 0.000023  | H6  | 1.893952  | 2.037076  | 0.000372  |
| C5  | -0.720265 | 2.760228  | -0.000033 | C14 | 2.754260  | 0.090749  | 0.000168  |
| C6  | -2.024383 | 3.185493  | -0.000162 | H7  | 3.334595  | -1.999817 | -0.000773 |
| C7  | -2.861576 | 2.037697  | -0.000143 | O1  | 3.984626  | 0.665167  | 0.000453  |
| C8  | -3.437069 | -1.237228 | 0.000081  | H8  | -3.941169 | 2.015497  | -0.000212 |
| C9  | -3.038888 | -2.599041 | 0.000182  | H9  | -4.444932 | -0.849607 | 0.000096  |
| C10 | -1.665761 | -2.639406 | 0.000095  | C15 | 5.116640  | -0.179881 | -0.000144 |
| C11 | 1.678899  | 0.976333  | 0.000186  | H10 | 5.143460  | -0.812581 | 0.895525  |
| C12 | 1.211617  | -1.754482 | -0.000352 | H11 | 5.143429  | -0.811350 | -0.896625 |
| H1  | 0.195845  | 3.327268  | -0.000082 | H12 | 5.982982  | 0.480975  | 0.000451  |

### 6-Fluorodipyrrolo[1,2-*a*:2',1'-*c*]quinoxaline (1c) optimized by DFT calculation

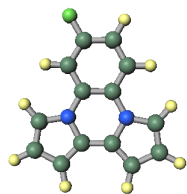

Total energy: -748.03783448 A.U.

Cartesian coordinates:

|     |           |           |           |     |           |           |           |
|-----|-----------|-----------|-----------|-----|-----------|-----------|-----------|
| C1  | -1.932344 | -0.413359 | -0.000001 | C12 | 1.506415  | -1.843434 | -0.000004 |
| N1  | -0.883246 | -1.319280 | -0.000004 | H1  | 0.706061  | 3.287511  | -0.000009 |
| C2  | 0.461843  | -0.918082 | -0.000002 | H2  | -1.793582 | 4.282864  | 0.000003  |
| C3  | 0.759665  | 0.458009  | 0.000001  | H3  | -3.456404 | -3.334760 | 0.000005  |
| N2  | -0.293670 | 1.379113  | 0.000001  | H4  | -0.769296 | -3.469489 | -0.000005 |
| C4  | -1.626209 | 0.991323  | 0.000000  | C13 | 2.831449  | -1.431598 | -0.000002 |
| C5  | -0.232815 | 2.758933  | -0.000005 | H5  | 1.287547  | -2.903900 | -0.000007 |
| C6  | -1.517457 | 3.238388  | 0.000001  | H6  | 2.356673  | 1.927047  | 0.000006  |
| C7  | -2.402894 | 2.127067  | -0.000001 | C14 | 3.093612  | -0.070770 | 0.000001  |
| C8  | -3.113204 | -1.121963 | 0.000005  | H7  | 3.645898  | -2.145539 | -0.000003 |
| C9  | -2.771177 | -2.499519 | 0.000003  | F1  | 4.374662  | 0.349480  | 0.000004  |
| C10 | -1.402016 | -2.597413 | 0.000000  | H8  | -3.482367 | 2.151349  | 0.000000  |
| C11 | 2.091198  | 0.878194  | 0.000003  | H9  | -4.104482 | -0.693892 | 0.000008  |

### 6,7-Difluorodipyrrolo[1,2-*a*:2',1'-*c*]quinoxaline (1d) optimized by DFT calculation

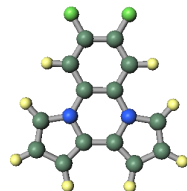

Total energy: -847.242917146 A.U.

Cartesian coordinates:

|     |           |           |           |     |           |           |           |
|-----|-----------|-----------|-----------|-----|-----------|-----------|-----------|
| C1  | 2.073781  | 0.718967  | 0.000000  | C12 | -1.584127 | 1.393318  | -0.000003 |
| N1  | 0.854722  | 1.381416  | -0.000002 | H1  | 0.284209  | -3.458908 | 0.000005  |
| C2  | -0.370218 | 0.703711  | -0.000002 | H2  | 2.938860  | -3.898603 | -0.000012 |
| C3  | -0.370121 | -0.703705 | 0.000000  | H3  | 2.937748  | 3.899123  | 0.000003  |
| N2  | 0.854955  | -1.381435 | 0.000001  | H4  | 0.283523  | 3.458886  | -0.000002 |
| C4  | 2.074079  | -0.718841 | 0.000001  | C13 | -2.774103 | 0.694409  | -0.000002 |
| C5  | 1.088862  | -2.742175 | 0.000003  | H5  | -1.622768 | 2.474672  | -0.000005 |
| C6  | 2.446550  | -2.937022 | -0.000007 | H6  | -1.622180 | -2.474506 | 0.000005  |
| C7  | 3.074794  | -1.663169 | 0.000000  | C14 | -2.774625 | -0.694873 | 0.000001  |
| C8  | 3.074320  | 1.663621  | 0.000004  | F1  | -3.938440 | 1.357114  | -0.000002 |
| C9  | 2.445888  | 2.937303  | 0.000002  | F2  | -3.938484 | -1.357643 | 0.000003  |
| C10 | 1.088159  | 2.742104  | 0.000000  | H7  | 4.134672  | -1.457109 | -0.000001 |
| C11 | -1.583854 | -1.393021 | 0.000002  | H8  | 4.134200  | 1.457583  | 0.000006  |

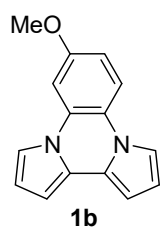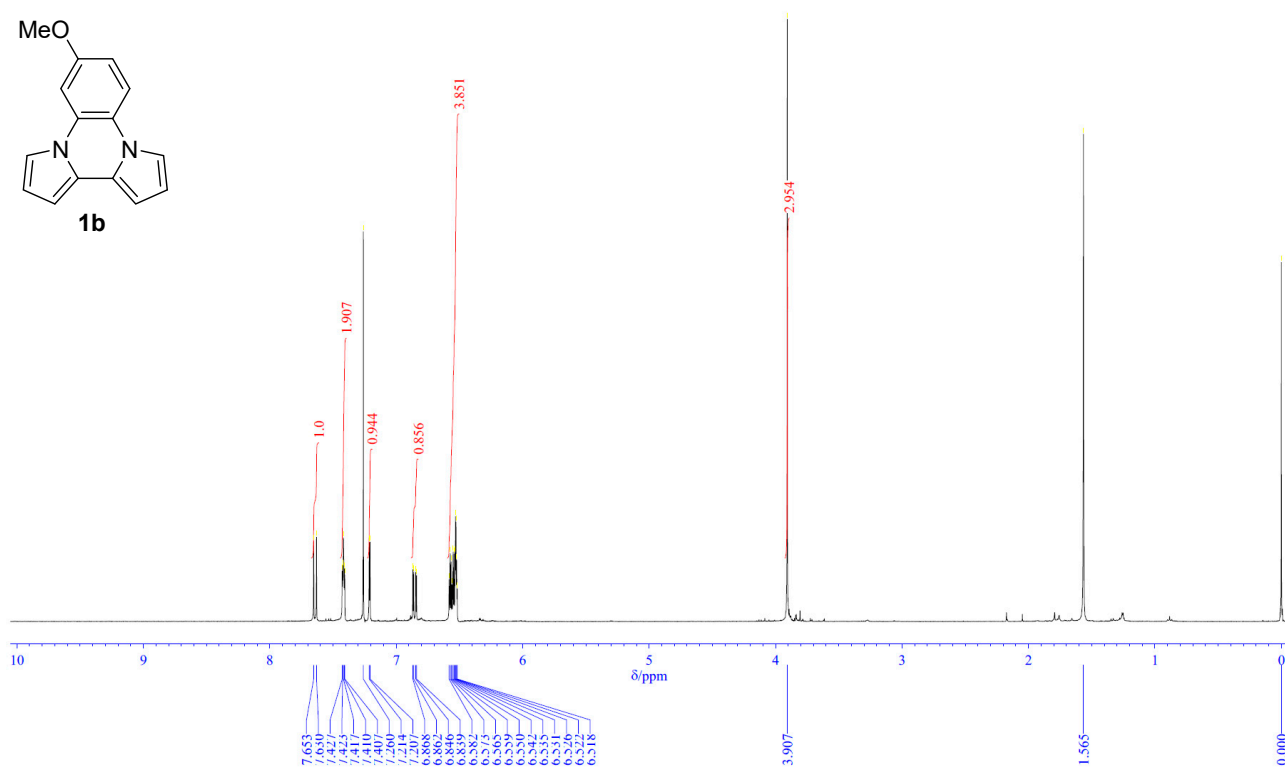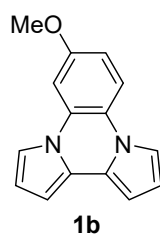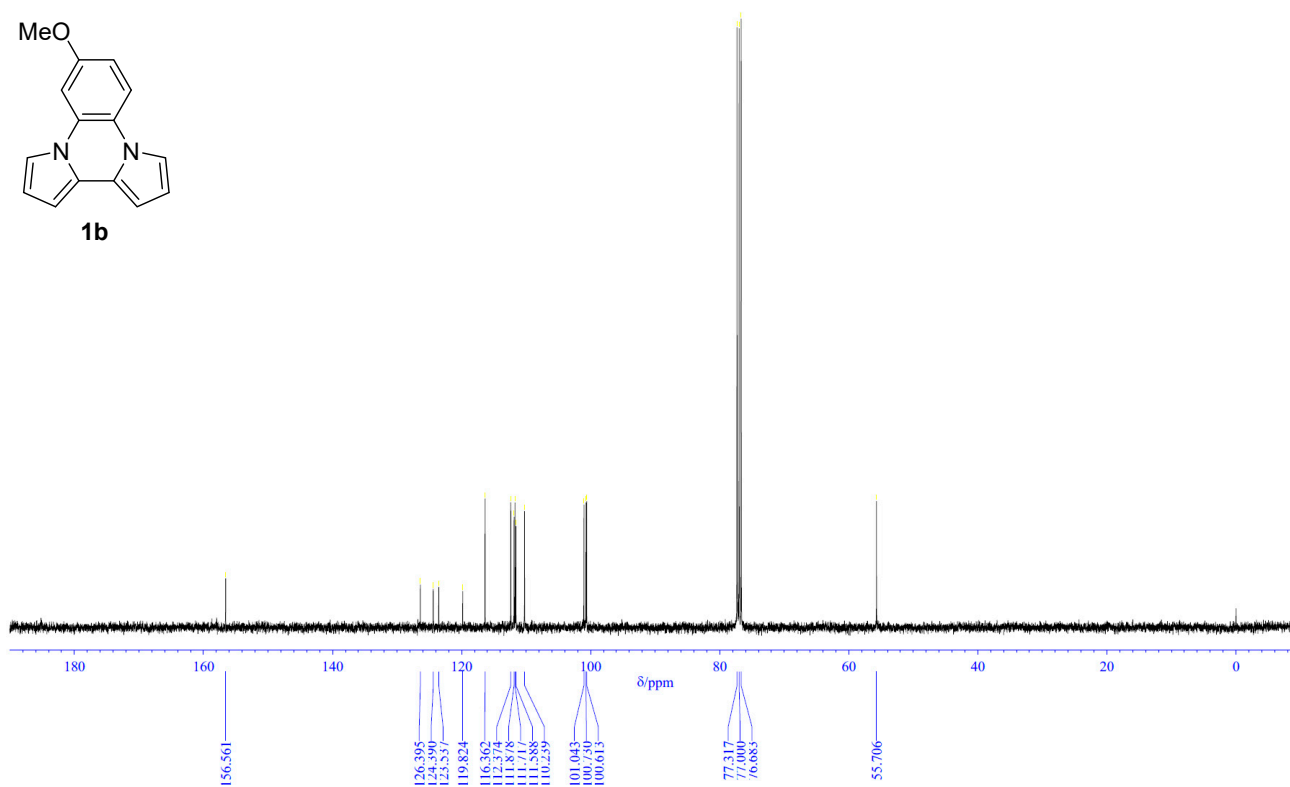



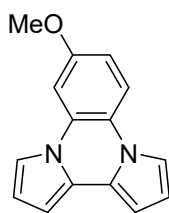

**1b**

\\EXACTIVE-W7\data\...221028\_3389\_01

2022/10/28 11:52:12

RT: 0.00 - 1.05

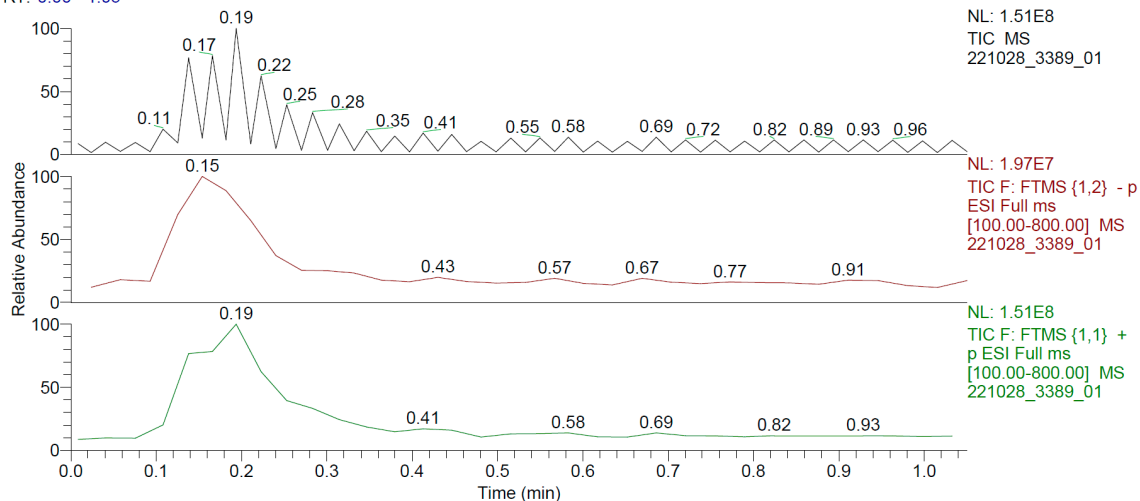

221028\_3389\_01 #12 RT: 0.18 AV: 1 NL: 1.41E6

T: FTMS {1,2} - p ESI Full ms [100.00-800.00]

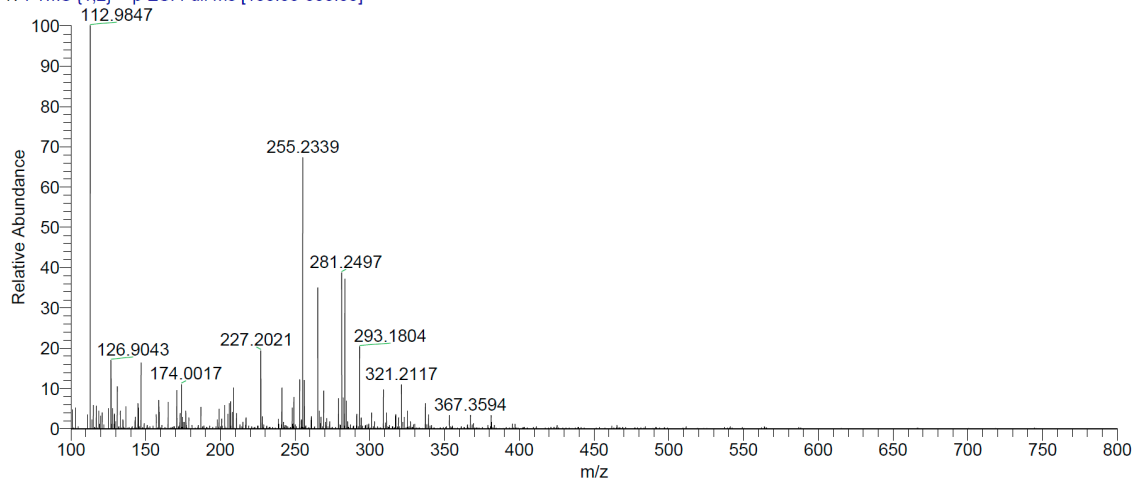

221028\_3389\_01 #10 RT: 0.15 AV: 1 NL: 1.56E4

T: FTMS {1,2} - p ESI Full ms [100.00-800.00]

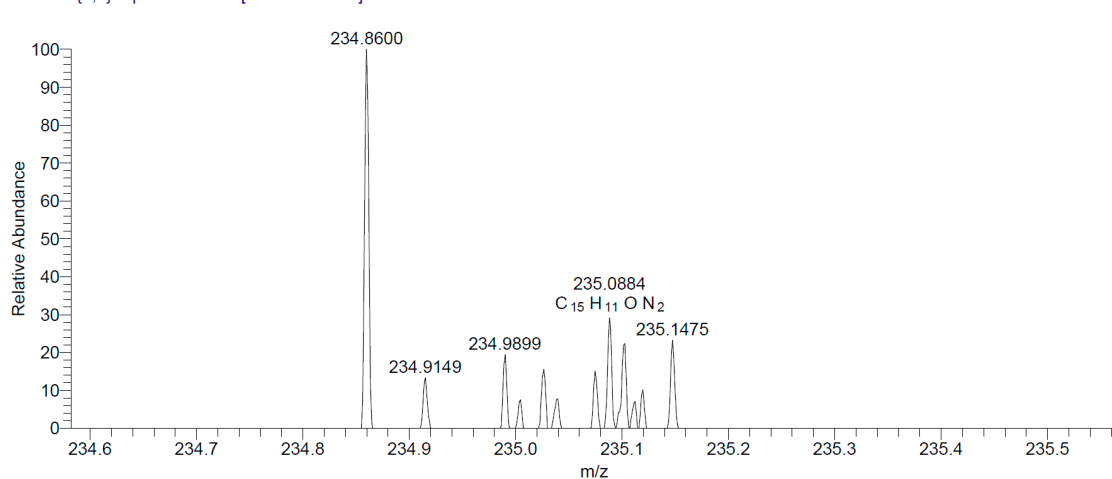

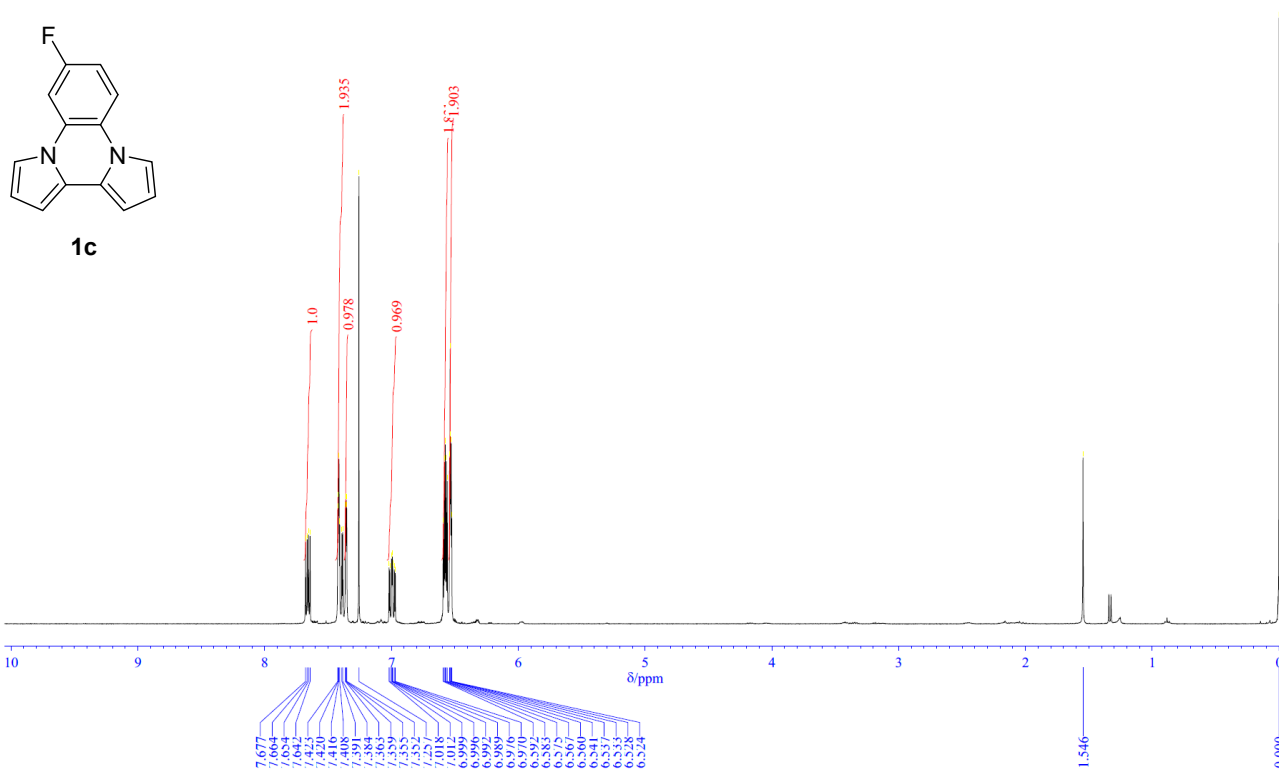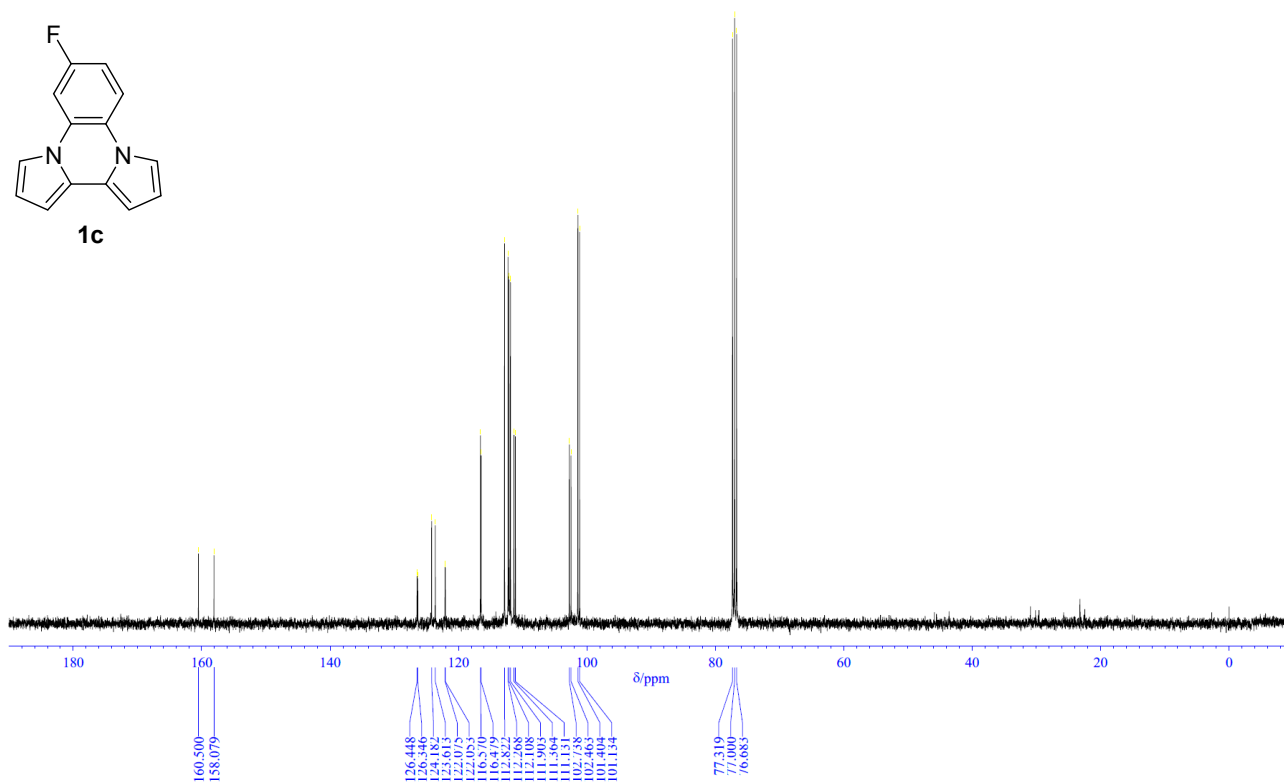

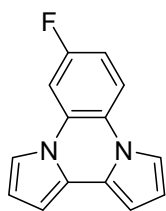

**1c**

\\EXACTIVE-W7\data\...230106\_3389\_12

2023/01/06 12:40:42

RT: 0.00 - 1.03

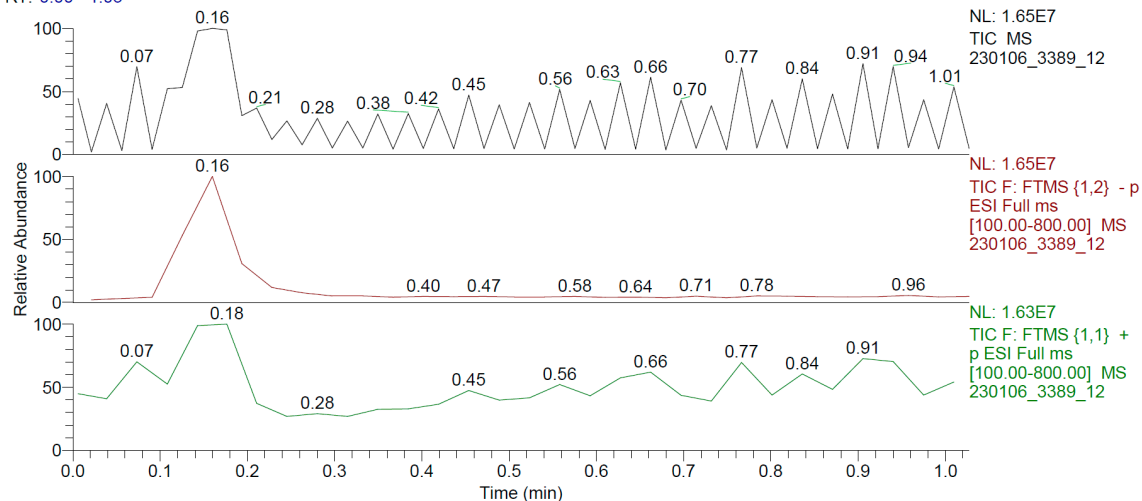

230106\_3389\_12 #11 RT: 0.18 AV: 1 NL: 1.36E6  
T: FTMS {1,1} + p ESI Full ms [100.00-800.00]

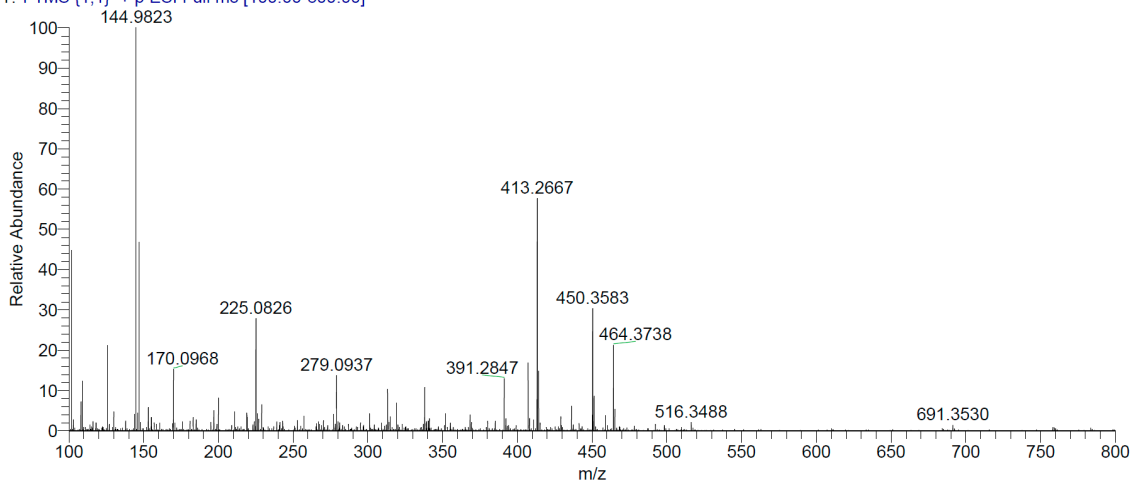

230106\_3389\_12 #11 RT: 0.18 AV: 1 NL: 3.79E5  
T: FTMS {1,1} + p ESI Full ms [100.00-800.00]

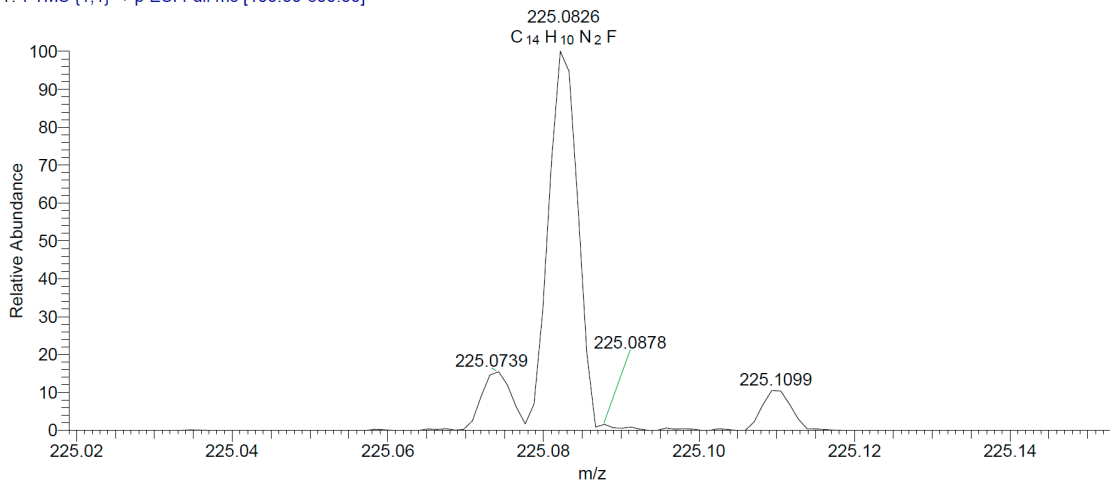

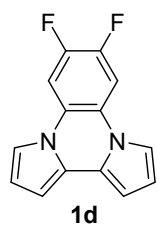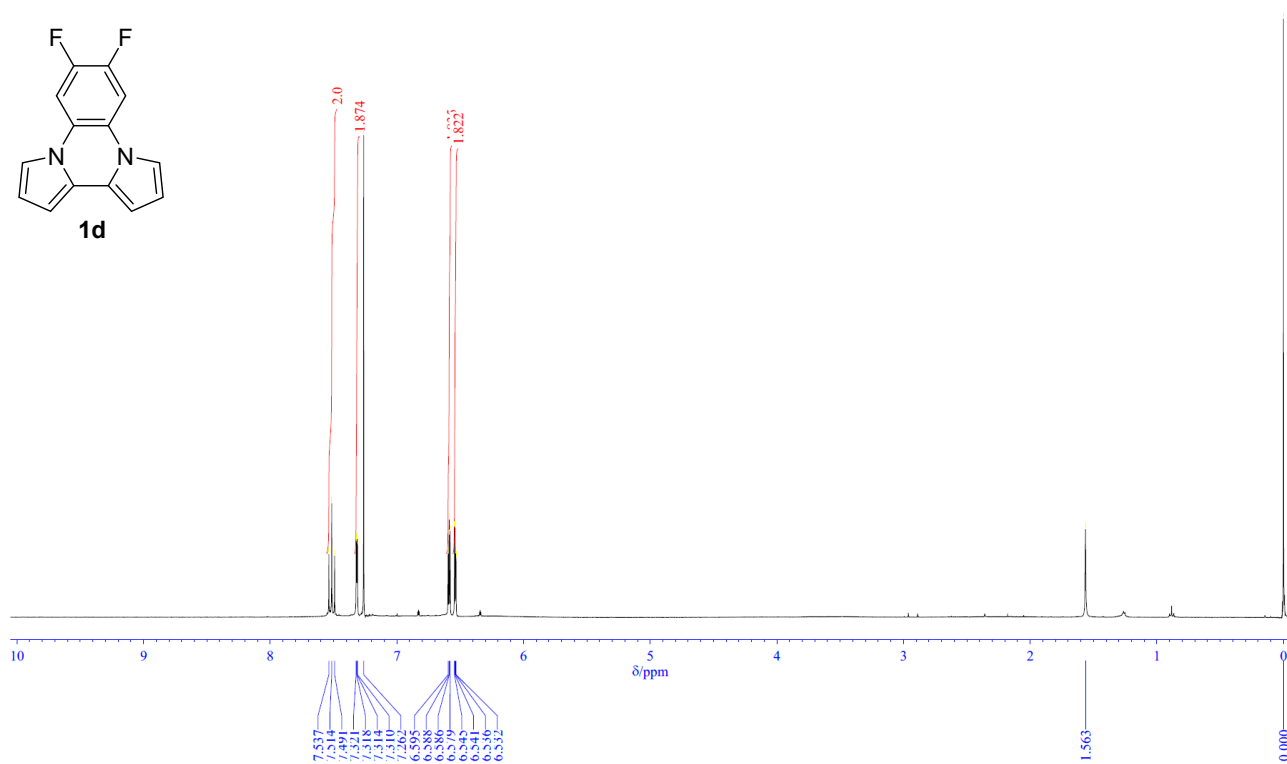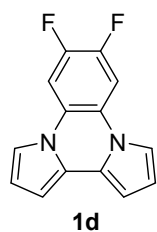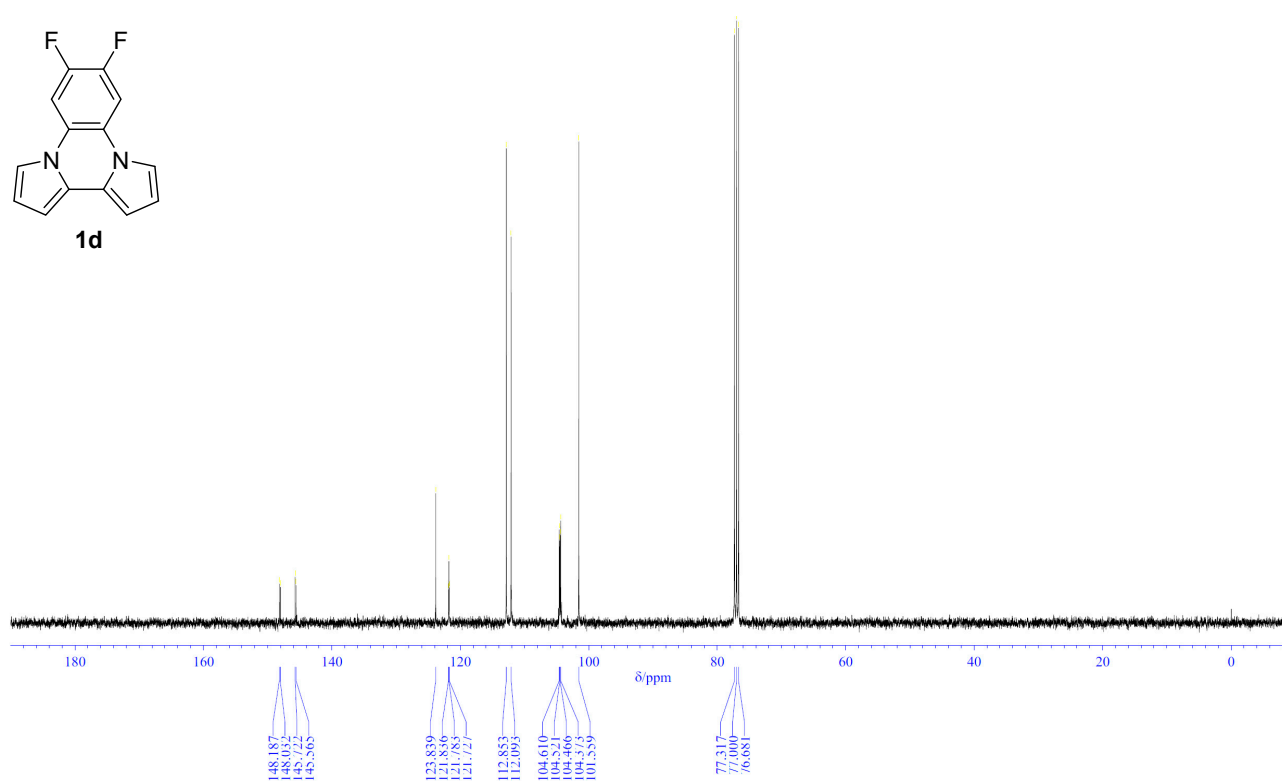

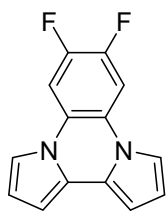

**1d**

\\EXACTIVE-W7\data\...230106\_3389\_13

2023/01/06 12:44:20

RT: 0.00 - 1.03

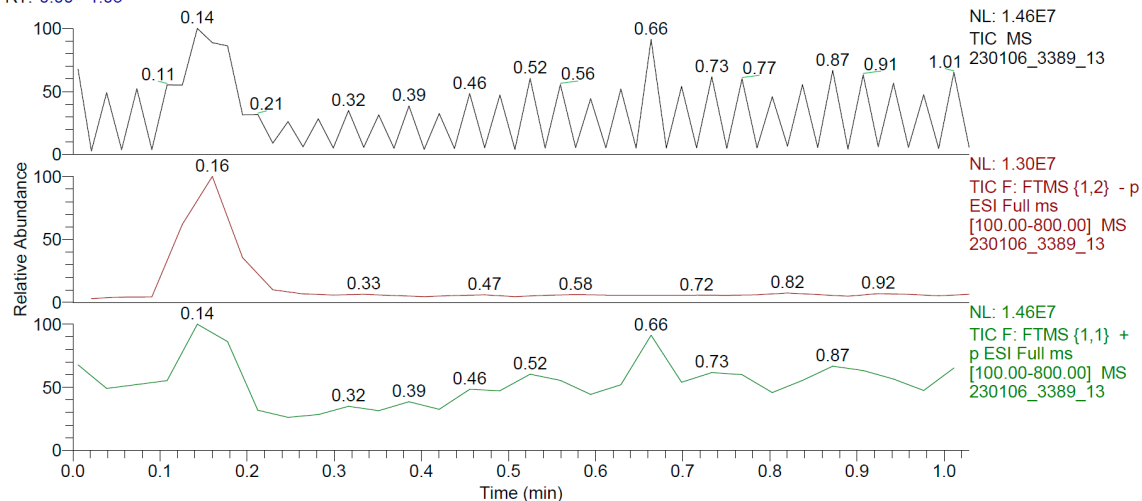

230106\_3389\_13 #11 RT: 0.18 AV: 1 NL: 1.28E6

T: FTMS {1,1} + p ESI Full ms [100.00-800.00]

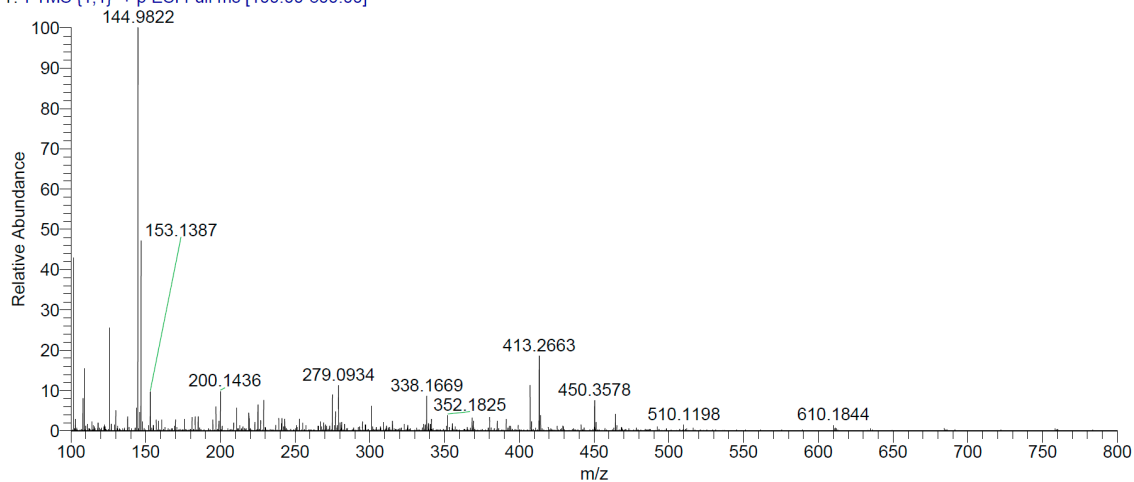

230106\_3389\_13 #9 RT: 0.14 AV: 1 NL: 2.46E4

T: FTMS {1,1} + p ESI Full ms [100.00-800.00]

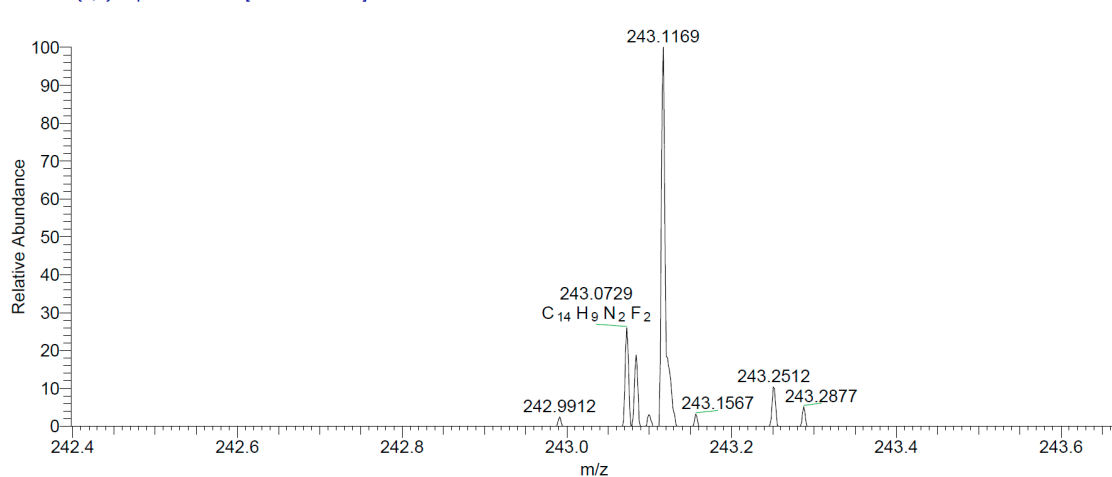

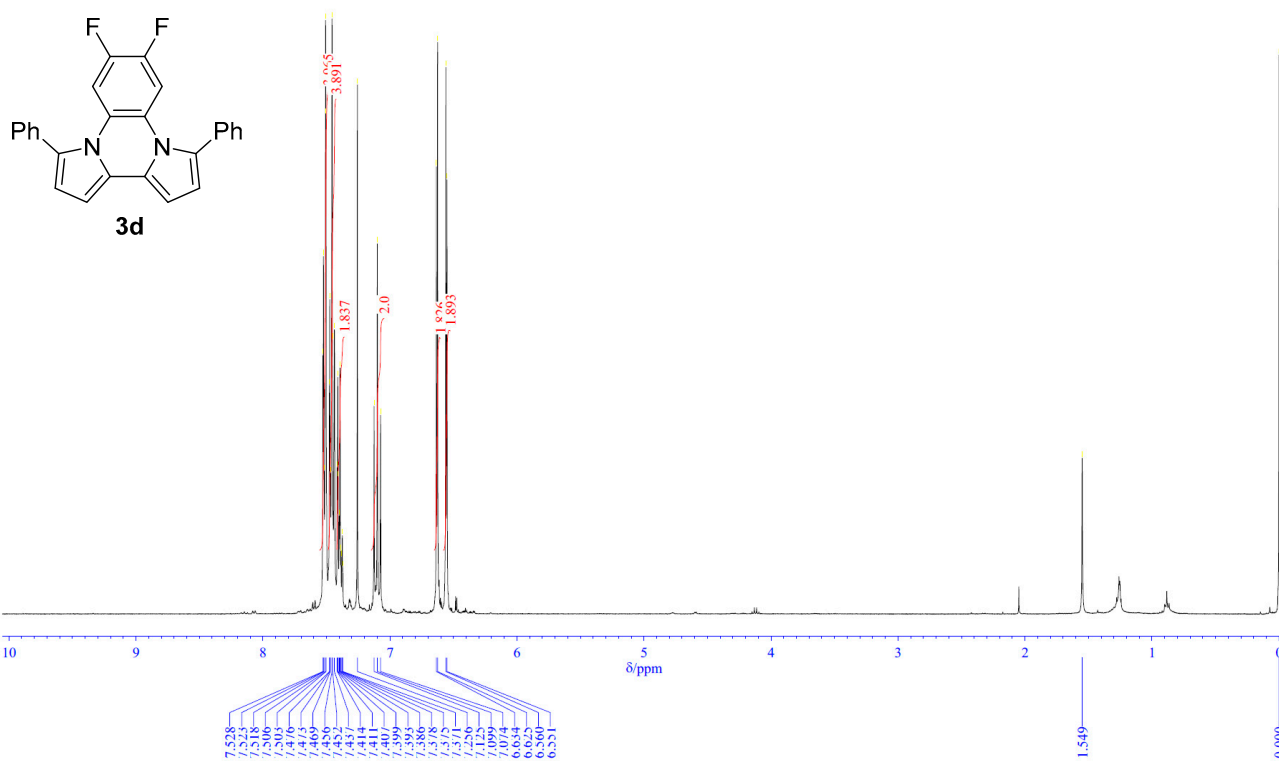

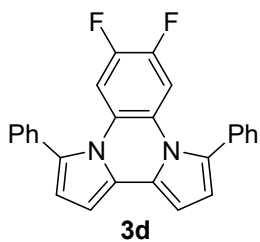

\\EXACTIVE-W7\data\...\230106\_3389\_15

2023/01/06 12:51:43

RT: 0.00 - 1.03

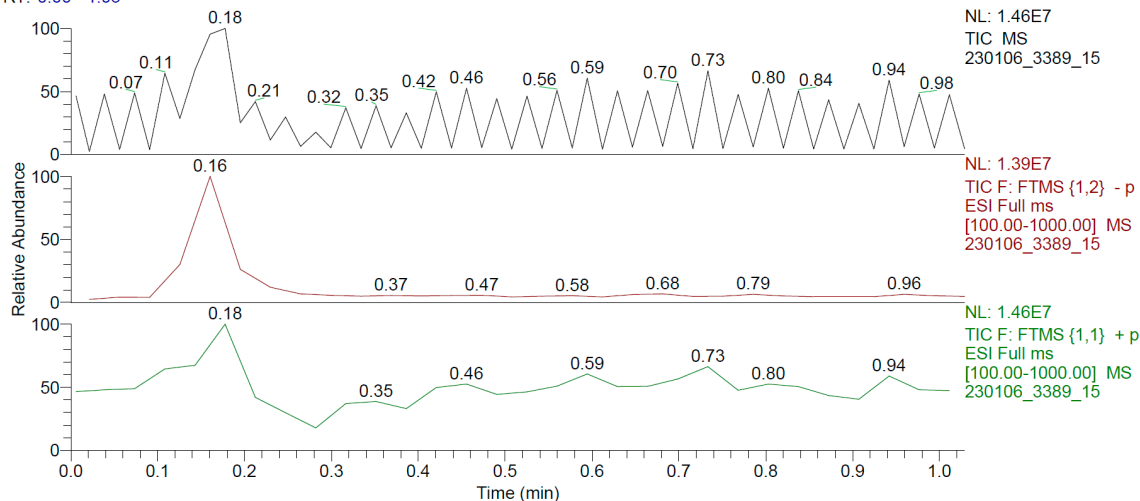

230106\_3389\_15 #11 RT: 0.18 AV: 1 NL: 1.17E6

T: FTMS {1,1} + p ESI Full ms [100.00-1000.00]

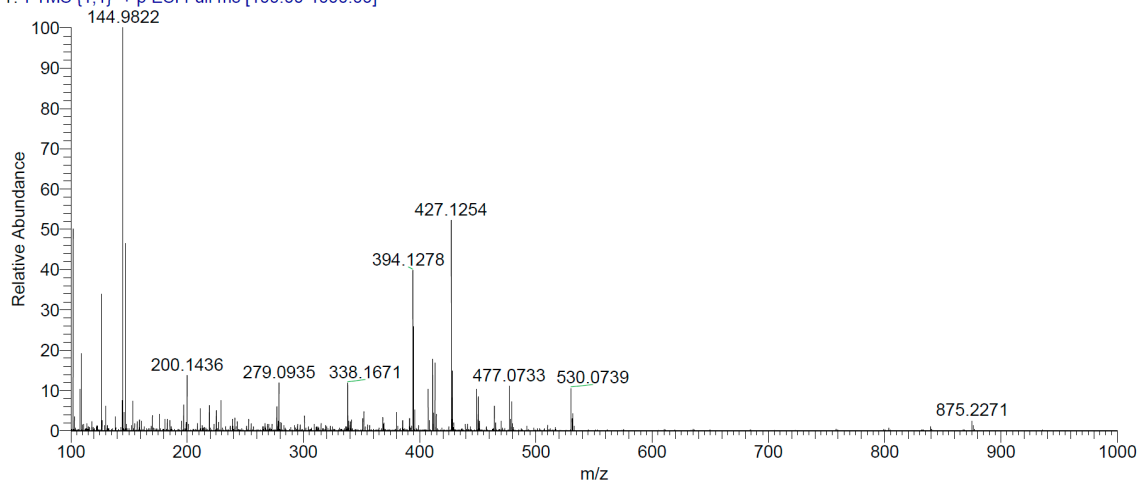

230106\_3389\_15 #11 RT: 0.18 AV: 1 NL: 3.03E5

T: FTMS {1,1} + p ESI Full ms [100.00-1000.00]

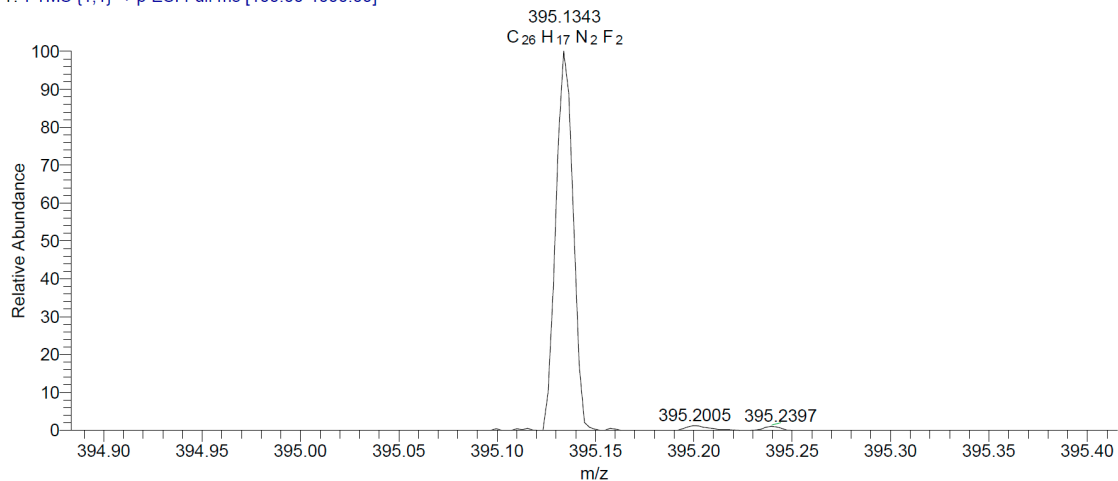

Supplement: s1 [file s1]
